# Supplementary material for: A tripartite paternally methylated region within the Gpr1-Zdbf2 imprinted domain on mouse chromosome 1 identified by meDIP-on-chip
Source: PubMed Central journal article supplement — Nucleic Acids Res. 2010 Apr 12;38(15):4929–45. doi: 10.1093/nar/gkq200 (PMC2926594; doi:10.1093/nar/gkq200), 2010-04-12
Supplement: gkq200_1.pdf [file gkq200_1.pdf]

**Supplemental Figure 1. Whole mouse genome meDIP-on-chip and genome tiling array screen for DMRs using PG- and AG-derived stem cells and sperm.**

A. Known imprinted DMRs in PG- and AG-derived cells were characterized by the COBRA method. The bisulphite-treated DNA amplified by PCR was digested with restriction enzymes (as representative results IG-DMR: *TaqI* and *Lit1*: *HpyCH4IV*) that cut only when the site in the genomic sample is methylated. The sizes of digested fragments are indicated on right (IG-DMR: 337 bp and *Lit1*: 185 bp). TS; DNA of TS cells, PG; DNA of PG-derived cells, AG; DNA of AG-derived cells, Sp; DNA of mature sperm.

B. Known imprinted DMRs and non-imprinted methylated regions estimated by meDIP quantitative real-time PCR method against DNA precipitated by the antibody against 5-methyl-cytosine. Black, gray and white bars represent cycle threshold (Ct) number subtracted Ct of meDIP DNA (meDIP) from that of whole genomic DNA (WG). Paternal DMRs: *H19*, IG-DMR and *Rasgrf1*. Maternal DMRs: *Nespas*, *Peg10*, *Peg3*, *Lit1*, *U2af1-rs1* and *Igf2r* (DMR2). Non-DMRs: *Nanog*, *Rest*, *Aicda*, *Tdrd12*, *Gdf3*, *Slc2a3*, *Aicda*, *Tdrd12* and *Utf1*.

Black, gray and white bars indicate data for sperm, AG- and PG-derived cells, respectively, which are different number of real-time PCR cycles of meDIP and amplified DNA, using Whole Genome Amplification kit.

**Supplemental Figure 2. Three paternally methylated DMRs in the *Gpr1-Zdbf2* imprinted domain.**

A. Bisulphite-PCR sequencing results for DMR1 (region 7) on genomic DNA prepared from E13.5 B6/JF1 fetus and placenta, and adult brain, liver, lung, heart and spleen. Each row represents a unique methylation profile within the pool of 20 clones sequenced. Closed and open circles represent methylated and unmethylated CpGs, respectively.

B. Bisulphite-PCR sequencing results for 16 regions on genomic DNA prepared from B6 sperm and the kidney from B6/JF1 adult mouse.

**Supplemental Figure 3. Tissue specific-imprinted expression of the mouse *Gpr1*.**

A. Direction expression analysis of mouse *Gpr1* gene. The 1st cDNA strands syntheses were performed using either the sense (S) or the antisense (AS) primer of the mouse *Gpr1* gene. Arrow indicates the cDNA product of *Gpr1* gene amplified by RT-PCR on right.

B. Analysis of mouse *Gpr1* gene. cDNA and genomic PCR products were amplified and sequenced directly from E13.5 embryos, placenta and yolk sac and adult materials obtained from B6/JF1 and JF1/B6 mice. Expression was biallelic in all tissues examined.

**Supplemental Figure 4. Dot-plot comparison of the mouse DMR1 and human DMRh1.**

Dots were placed at locations with identical nucleotides when more than 28 of 70 nucleotides were identical.

**Supplemental Table S1. Primer sequences and PCR conditions.**

**Supplemental Table S2. DNA polymorphisms between B6 and JF1 strain and position of GenBank accession number AL669947.**

# Supplemental Figure S1

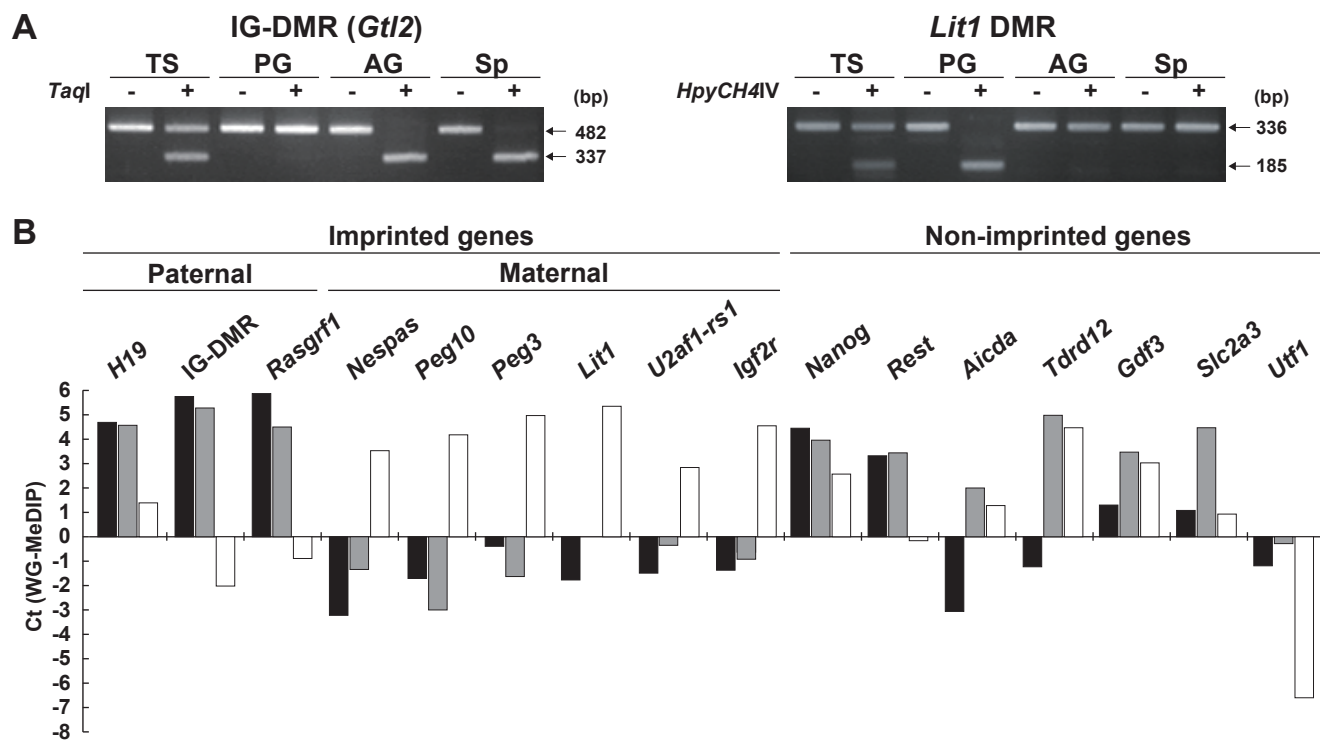

# Supplemental Figure S2

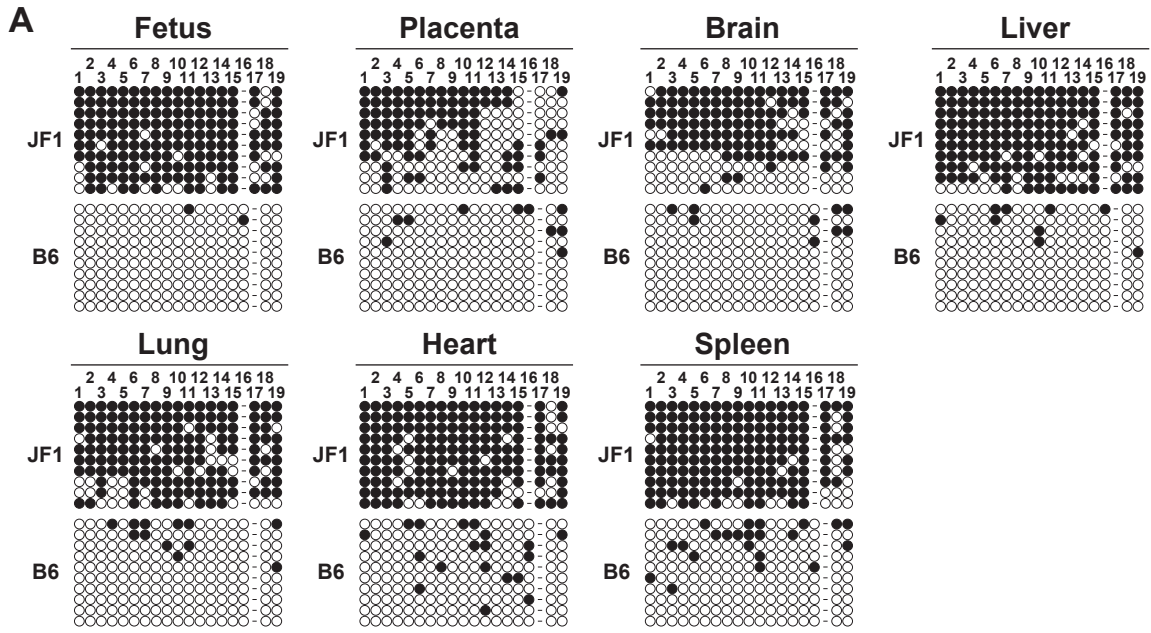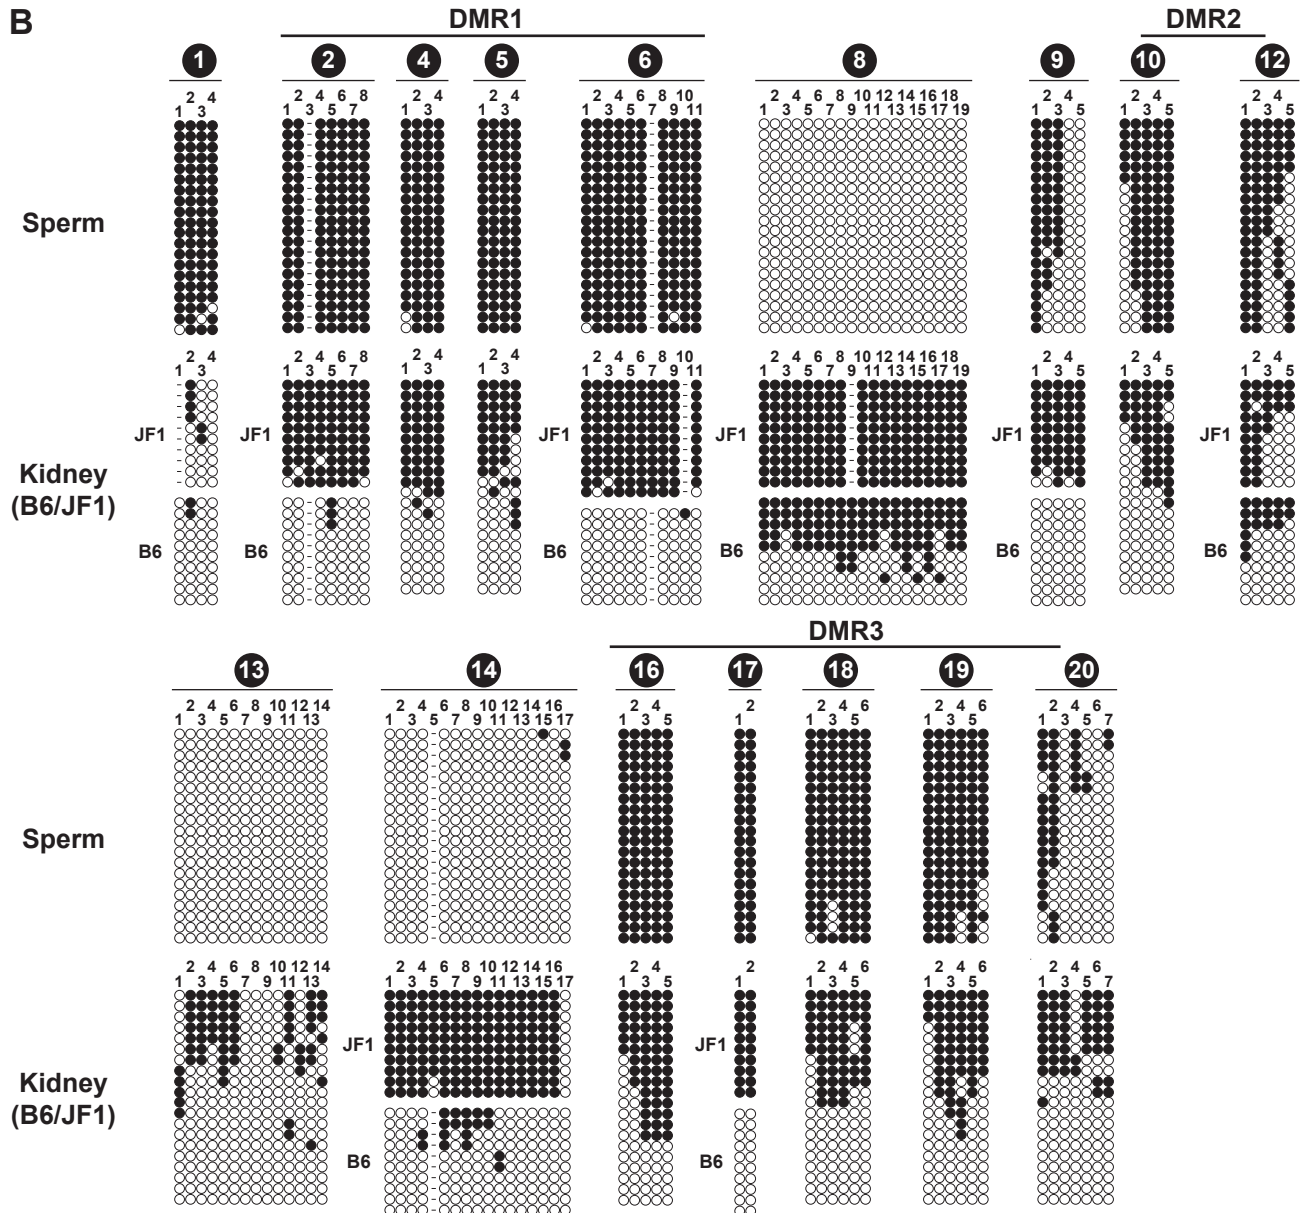

# Supplemental Figure S3

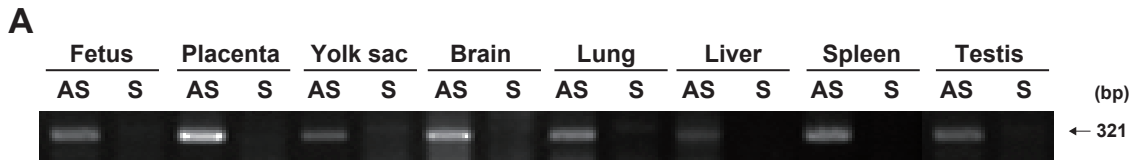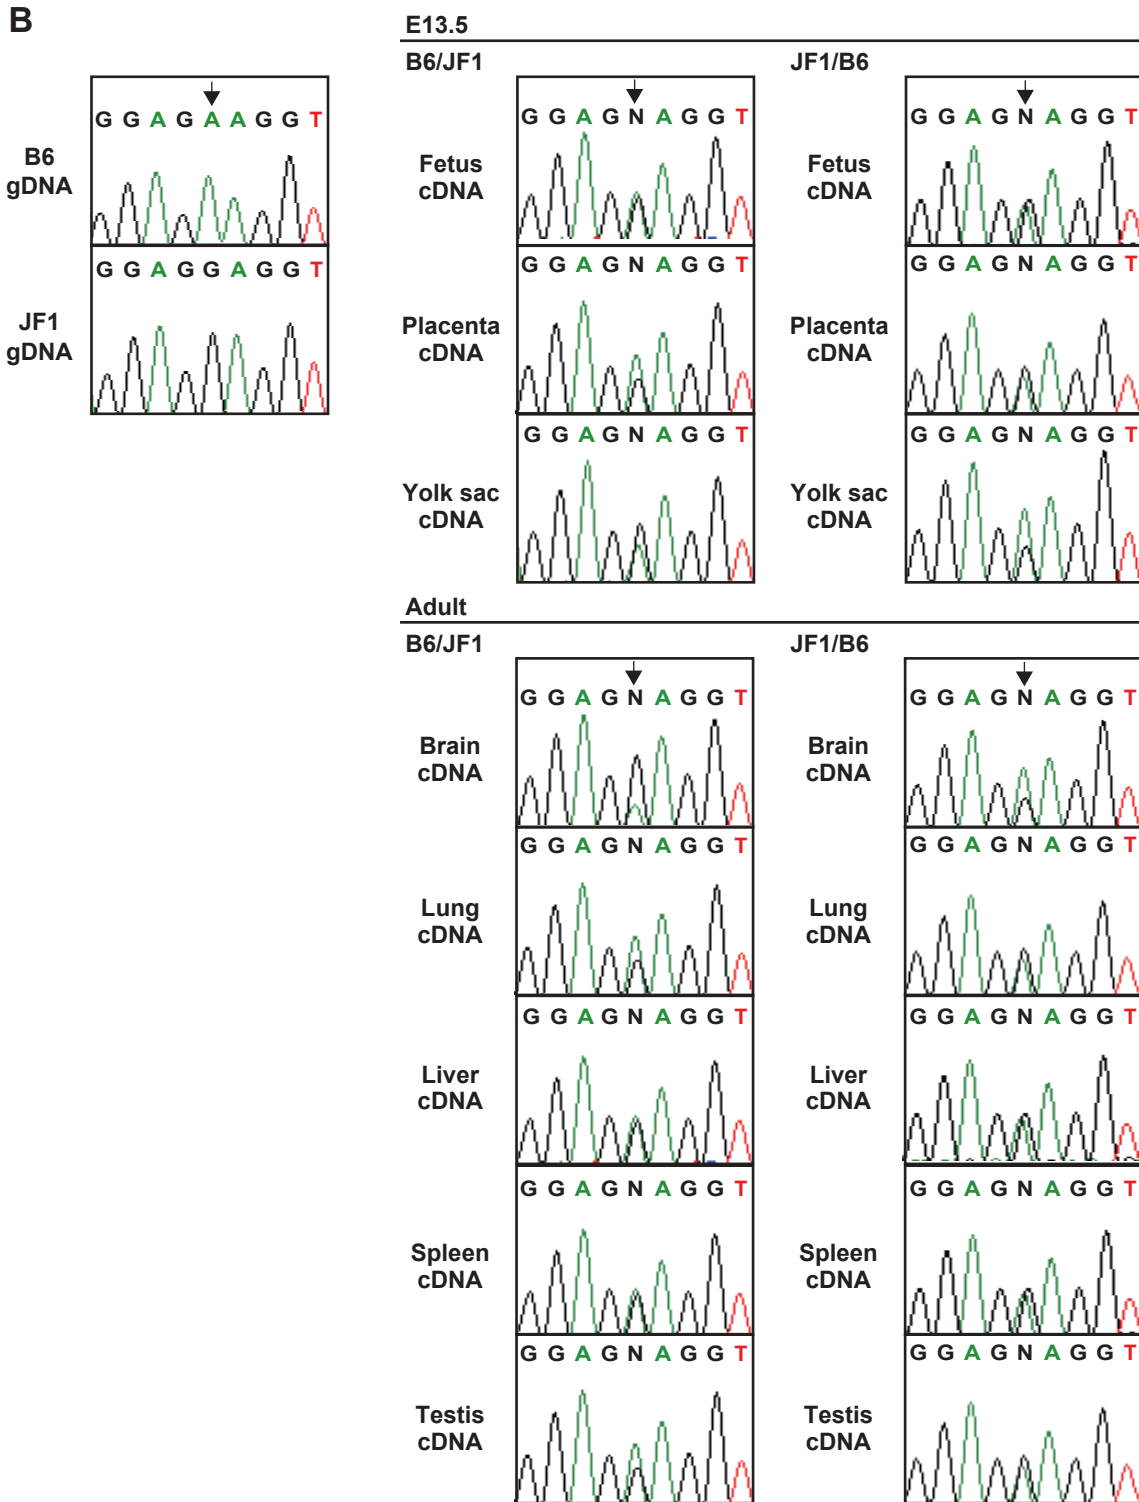

Supplemental Figure S4

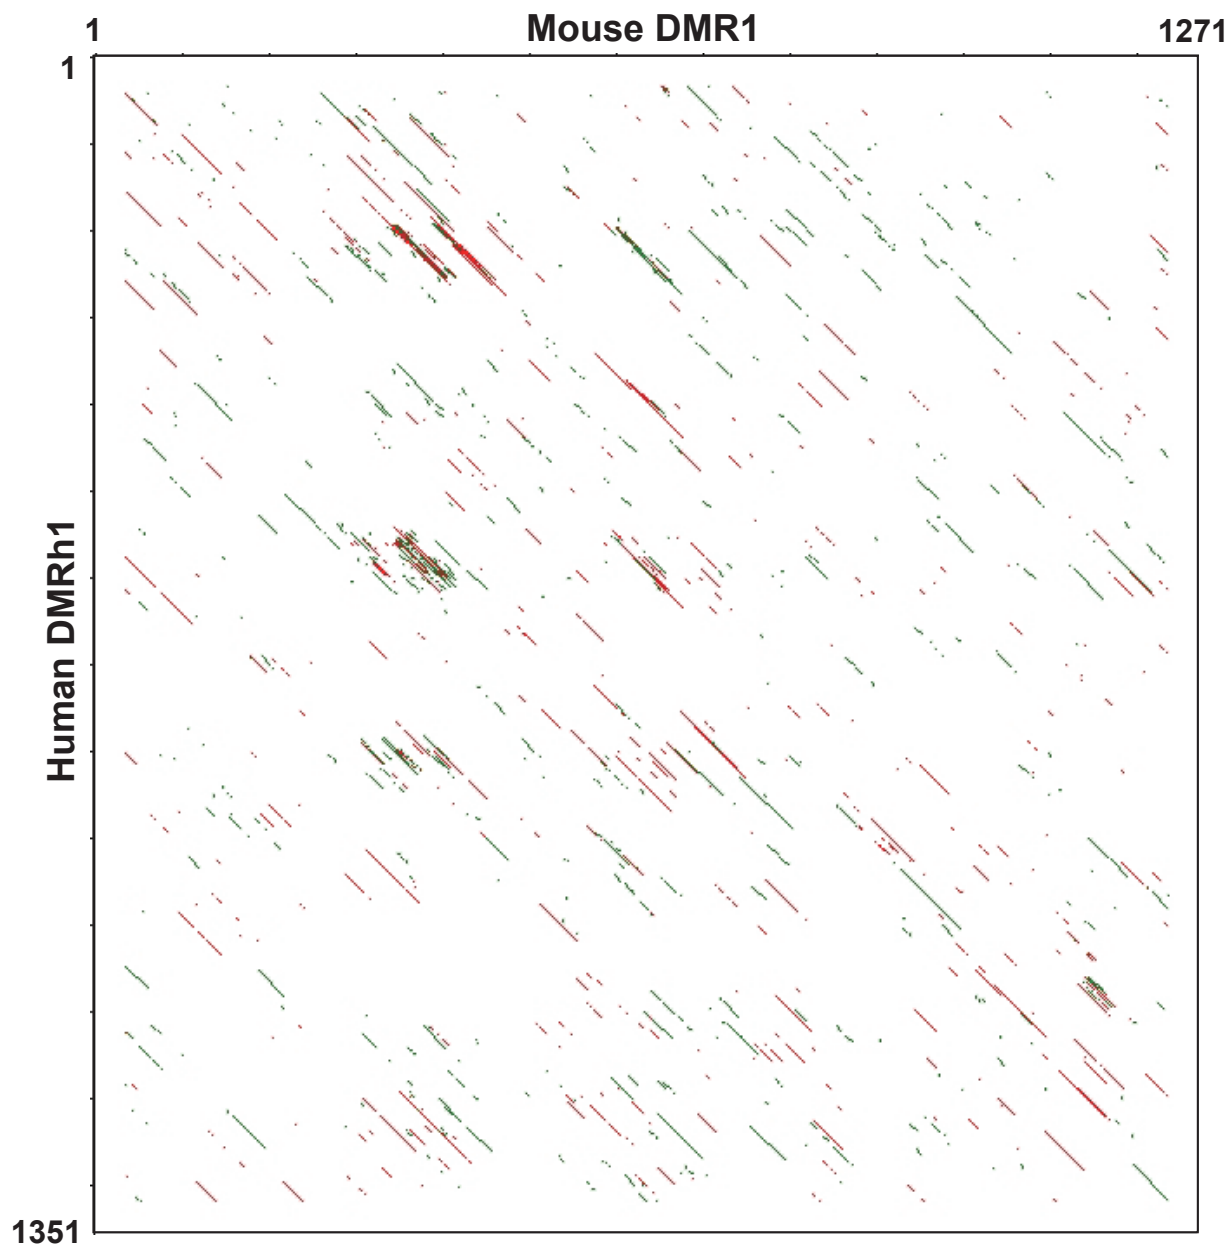

**Supplementary Table S1. Primer sequences and PCR conditions.**

| Locus                    | PCR | Primer sequence (5'-3')                        | Annealing temp                                                       | Cycles | Amplicon (bp) |
|--------------------------|-----|------------------------------------------------|----------------------------------------------------------------------|--------|---------------|
| <b>Methylation assay</b> |     |                                                |                                                                      |        |               |
| <b>Mouse</b>             |     |                                                |                                                                      |        |               |
| IG-DMR ( <i>Gtl2</i> )   | 1st | IG-DMR cBSF1<br>IG-DMR cBSR1                   | TTAAGGTATTTTTATTGATAAAAAATAGTAGT<br>CCTACTCTATAATACCCATATAATTATACCA  | 55°C   | 30            |
|                          | 2nd | IG-DMR cBSF2<br>IG-DMR cBSR2                   | TTAGGAGTTAAGGAAAAGAAAAGAAATAGTAT/<br>TATACACAAAAATATATCTATAAACACCATA | 55°C   | 482           |
| <i>H19</i> DMR           |     | H19 BisOF1<br>H19 BisOR2                       | TTGTGAGTGGAAGATTAAATGTTG<br>ATCTTACCACCCTATAAATCCCT                  | 57°C   | 423           |
| <i>Rasgrf1</i> DMR       | 1st | <i>Rasgrf-1</i> BSF1<br><i>Rasgrf-1</i> BSR1   | ATGTGGTTTTGTAGTTGAA<br>CAAAAACAACAATAAAGT                            | 55°C   | 30            |
|                          | 2nd | <i>Rasgrf-1</i> BSF1<br><i>Rasgrf-1</i> BSR2   | ATGTGGTTTTGTAGTTGAA<br>CAATAAAAAACAACAACAAC                          | 55°C   | 467           |
| <i>Nespas</i> DMR        |     | <i>Nespas</i> BSF<br><i>Nespas</i> BSR         | AGGGATGGTTTTATGGGGTTTTTGATT<br>AACCAACTAAATCTCAACCACTAAC             | 57°C   | 337           |
| <i>Gnas1A</i> DMR        |     | <i>Gnas1A-C_F</i><br><i>Gnas1A-C_R</i>         | GGTATTATGTTGAAGATGGTTATGAAGTTAA<br>AACATCATCTTCTTCATCAATATCACTATCC   | 60°C   | 519           |
| <i>Peg10</i> DMR         |     | <i>Peg10-E_F</i><br><i>Peg10-E_R</i>           | GTATTTAATTTGGAAAGTTGATAGGAGAG<br>CTCCAACCACCAAAATCCCT                | 60°C   | 603           |
| <i>Peg1</i> DMR          | 1st | <i>Peg1/Mest</i> BSF1<br><i>Peg1/Mest</i> BSR1 | GATTTGGGATATAAAGGTTAATGAG<br>TCATTAATAAACACAAACCTCCTTTAC             | 55°C   | 30            |
|                          | 2nd | <i>Peg1/Mest</i> BSF2<br><i>Peg1/Mest</i> BSR2 | TTTTAGATTTTGAGGGTTTTAGGTTG<br>AATCCCTTAAAAATCATCTTTCCACAC            | 55°C   | 563           |
| <i>Peg3</i> DMR          | 1st | KH63 <i>Peg3</i> F1<br>KH64 <i>Peg3</i> R1     | TTTTTGTAGTTTTGTGGGGTTTTTAATA<br>AATCCCTATCACCTAAATACATCCCTACA        | 57°C   | 30            |
|                          | 2nd | KH65 <i>Peg3</i> F2<br>KH66 <i>Peg3</i> R2     | TTGATAATAGTAGTTTGTAGTTGGTGGGTG<br>ATCTACAACCTTATCAATCCCTTAAAAA       | 57°C   | 451           |
| <i>Snrpn</i> DMR         | 1st | KH99 <i>Snrpn</i> F1<br>KH100 <i>Snrpn</i> R1  | AAATTTGTGTAGTTTGTAAATTTGGG<br>AAAATCCACAAACCACTAACCTTCC              | 57°C   | 30            |
|                          | 2nd | KH101 <i>Snrpn</i> F2<br>KH102 <i>Snrpn</i> R2 | AATTATATTTATTTTAGATTGATAGTGAT<br>TTTACAATCACTCCTCAAAACCAA            | 57°C   | 294           |
| <i>Lit1</i> DMR          | 1st | <i>Lit-BS4</i><br><i>Lit-BS2</i>               | TAAGGTGAGTGGTTTGGATT<br>AATCCCCACACCTAAATTC                          | 57°C   | 30            |
|                          | 2nd | <i>Lit-BS4</i><br><i>Lit-BS21</i>              | TAAGGTGAGTGGTTTGGATT<br>CCACTATAAACCCACACATA                         | 57°C   | 336           |
| <i>Zac1</i> DMR          | 1st | <i>Zac1</i> BSF1<br><i>Zac1</i> BSR1           | GGGTAGGTAAGTAGTGATAA<br>CCTAAACACCAAAATAACA                          | 54°C   | 30            |
|                          | 2nd | <i>Zac1</i> BSF2<br><i>Zac1</i> BSR2           | ATTTGGGTGTTTTAGTTGTA<br>TACAAAACCAAAACCCCTTAC                        | 54°C   | 383           |
| <i>U2af1-rs1</i> DMR     | 1st | <i>U2af1-rs1</i> BSF1<br><i>U2af1-rs1</i> BSR1 | GGTTGAGTATTTTTATTGTA<br>TACATAAACCTACCCATACA                         | 55°C   | 30            |
|                          | 2nd | <i>U2af1-rs1</i> BSF3<br><i>U2af1-rs1</i> BSR1 | ATTGTAGATATTTGGATGAT<br>TACATAAACCTACCCATACA                         | 55°C   | 502           |
| <i>Igf2r</i> DMR2        | 1st | <i>Igf2r</i> 13B-4<br><i>Igf2r</i> 13B-2       | TAGAGGATTTAGTATAATTTTAA<br>CACTTTTAACTACCTCTCTTAC                    | 55°C   | 30            |
|                          | 2nd | <i>Igf2r</i> 13B-5<br><i>Igf2r</i> 13B-2       | GAGGTTAAGGGTGAAGTTGAT<br>CACTTTTAACTACCTCTCTTAC                      | 57°C   | 490           |
| <i>Impact</i> DMR        |     | <i>Impact-C F</i><br><i>Impact-C R</i>         | TGTTTTGAAGGATGAGTATGAGAGTTTT<br>CCCTACTAAA ACCTTACCTA CCTCTAAC       | 60°C   | 405           |
| DMR region 1             |     | R0-6467 BSF1<br>R0-6467 BSR1                   | TTTTTAATTAGTTGTTTTGTTTT<br>AAAACCTAACCAATAAAATCTAATT                 | 55°C   | 291           |
| DMR region 2             |     | R1-0208 BSF1<br>R1-0208 BSR1                   | GTTTTAGTGTAGTTTTGGGTTTTTTTT<br>CCAAACAAAACAACAACCACT                 | 58°C   | 505           |
| DMR region 3             |     | 1700039101 Rik BSF<br>1700039101 Rik BSR       | TTTGTGGTATGTGTAGAAGATTT<br>ACAAATCATACTATCTACAAAAAAC                 | 55°C   | 451           |
| DMR region 4             |     | R1-2831 BSF1<br>R1-2831 BSR1                   | GGAGTAGTATTTAGTTTTGTTTTTAT<br>AAAAAATAAAAAAACACTAATAAT               | 57°C   | 241           |
| DMR region 5             |     | R1-3235 BSF1<br>R1-3235 BSR1                   | TAGGATTTTTGGAGTTGGAGTTAT<br>TTAAACTCTCAACAATCATTACCAA                | 57°C   | 380           |
| DMR region 6             |     | R1-3948 BSF1<br>R1-3948 BSR1                   | TGTGATAGGTTTGTATGGTTTGT<br>ATAATCAACTACYAAAAAACCCATA                 | 55°C   | 365           |
| DMR region 7             |     | 1P1 BSF2<br>1P1b BSR1                          | GATTTAGATTTAGTTGGTTAGTTTATAT<br>CAAACCTAACCTACAAATACCTTATTACC        | 57°C   | 840           |
| DMR region 8             |     | R2-1331 BSF1<br>R2-1331 BSR1                   | TTATATTAGTTTGGGGGAGAGTT<br>AAAACCTAAAACAAAAAATCTTAAC                 | 55°C   | 406           |
| DMR region 9             |     | R2-3337 BSF1<br>R2-3337 BSR1                   | AAAGGGATATATGATTTTTATGTAAA<br>ACTTTATTTCCAACAAATCCAAAC               | 55°C   | 414           |
| DMR region 10            |     | R2-3842 BSF1<br>R2-3842 BSR1                   | TATATTTTGTATGATTTGAAGTT<br>AACAAAAAATCAAAATAAAAAACAT                 | 55°C   | 503           |
| DMR region 11            |     | 1P1down BSF1<br>1P1down BSR1                   | TAAATAAATAAAGGGTTGGTTAGTT<br>AAATCAAACCTACAACTCCAAACTA               | 55°C   | 334           |
| DMR region 12            |     | R3-0105 BSF1<br>R3-0105 BSR1                   | GGTAGGAAGAGTAAATAAGGTTTT<br>CTCAAAAATACAAAATACATAATAA                | 57°C   | 387           |
| DMR region 13            |     | R3-0619 BSF1<br>R3-0619 BSR1                   | TTATTGAGATGGAGTTATAGTGAAT<br>TACTTAAACAATTCTAAAATCAATATAA            | 55°C   | 386           |



|                                           |                                        |                                                            |      |    |     |
|-------------------------------------------|----------------------------------------|------------------------------------------------------------|------|----|-----|
| DMR region 14                             | R3-2035 BSF1<br>R3-2035 BSR1           | TATTTTGTGGTTTTGAGGATT<br>ACATACTACTAATAAATCCCATAAATATA     | 58°C | 40 | 492 |
| DMR region 15                             | CpG3com BSF1<br>CpG3com BSR1           | AATTAAGATATTAGATTATGGATAGATTTTT<br>ATAAACTCTCCAAAACCAAAAAA | 57°C | 40 | 339 |
| DMR region 16                             | R3-7276 BSF1<br>R3-7276 BSR1           | TATAATGTGAGTGGATTGTTAATTT<br>AATACCAATATAAATACACAATAC      | 52°C | 40 | 333 |
| DMR region 17                             | R3-7980 BSF1<br>R3-7980 BSR1           | TGAGTTTTGTGGTGTATATTTTA<br>CATCCTAACCAACAATATTAATAAAC      | 55°C | 40 | 185 |
| DMR region 18                             | R4-0106 BSF1<br>R4-0106 BSR1           | TGTGATTTATGTTTTGAGTTAGTTG<br>ACTCCTACTTAAATCAAAAAATACC     | 55°C | 40 | 383 |
| DMR region 19                             | R4-0712 BSF1<br>R4-0712 BSR1           | TATGGTATTTTGTAGTGGGTTT<br>CAACTATTTAAACTATTCTTACTTCAAAC    | 55°C | 40 | 411 |
| DMR region 20                             | R4-1319 BSF1<br>R4-1319 BSR1           | GTGTTTTAGTTGAAATATAGTTATGTTAG<br>CCCTCTAAACTTAAATACAAA     | 55°C | 40 | 301 |
| <b>Human</b>                              |                                        |                                                            |      |    |     |
| <i>H19</i> DMR                            | H19 F2<br>H19 R1                       | TATATGGGTATTTTGGAGGTTTTT<br>ATAAATATCCTATTCCCAATAACCCC     | 57°C | 40 | 220 |
| DMRh1                                     | h2Pc4 BSF1<br>h2Pc4 BSR1               | GTTTTGTAGTTAGATTGGAAAAATA<br>AAAAATAAATACCTAAAAATAAAAAAC   | 55°C | 40 | 210 |
| DMRh2                                     | h2Pc1 BSF1<br>h2Pc1 BSR1               | TTTTATTTTTTGGTTGTGGAATA<br>ACCTCTAAATAACTAAAACTATAATCATA   | 55°C | 40 | 394 |
| <b>SNP analysis</b>                       |                                        |                                                            |      |    |     |
| <b>Human</b>                              |                                        |                                                            |      |    |     |
| <i>GPR1</i>                               | GPR1 s3F2<br>GPR1 s3R0                 | ATCTTCACGTTCTTATCATTCACTG<br>GGTGACTGTCTTCTCCACTTGAAC      | 60°C | 35 | 324 |
| <b>Gene expression</b>                    |                                        |                                                            |      |    |     |
| <b>Mouse</b>                              |                                        |                                                            |      |    |     |
| <i>Gpr1</i>                               | Gpr1 exF<br>Gpr1 exR                   | CGGGGTGTCATTTCAAAAGT<br>AGGGCATATAAGAACAGGGAGA             | 59°C | 35 | 321 |
| <i>Gapdh</i>                              | Gapdh exF<br>Gapdh exR                 | GTGCTGGAGTCTACTGGTGC<br>GAGCCCTCCACAATGCCAAA               | 60°C | 30 | 241 |
| <b>Human</b>                              |                                        |                                                            |      |    |     |
| <i>GPR1</i>                               | GPR1 exF2<br>GPR1 exR                  | GAAGGTACACCCAGGCATGACA<br>TCCAGAACAAAAGCCAAACAA            | 57°C | 40 | 236 |
| <i>GAPDH</i>                              | GAPDH exF<br>GAPDH exR                 | GTGCTGGAGTCCACTGGCGTC<br>GAGTCTCCACAATACAAA                | 60°C | 30 | 244 |
| <b>In situ hybridization probe</b>        |                                        |                                                            |      |    |     |
| <b>Mouse</b>                              |                                        |                                                            |      |    |     |
| <i>Zdbf2</i>                              | Zdbf2 H-F<br>Zdbf2 H-R                 | CGGCAGCAGCAGCAGATCCT<br>AAAAGACGCACCTTAGCCCTAA             | 60°C | 40 | 593 |
| <i>Gpr1</i>                               | Gpr1 exF2<br>Gpr1 exR2                 | CATTTCACTCTGGAGTTGGAAG<br>TGGCAATGAAGGAATTAAC              | 60°C | 35 | 453 |
| <b>Methylated-DNA immunoprecipitation</b> |                                        |                                                            |      |    |     |
| <b>Mouse</b>                              |                                        |                                                            |      |    |     |
| <i>H19</i> DMR                            | ChIP-H19m3F1<br>ChIP-H19m3R1           | AGGTTGGAACACTTGTGTTTCTGGAG<br>TGGCCACGATATATAGGAGTATGCT    | 65°C | 40 | 159 |
| IG-DMR (Gtl2)                             | MeDIP IG-DMR F1<br>MeDIP IG-DMR R1     | CGCTATGAACTACCGCTACG<br>CGGCATTAGTACACGGCGAACCTCC          | 65°C | 40 | 136 |
| <i>Rasgrf1</i> DMR                        | MeDIP Rasgrf1 F1<br>MeDIP Rasgrf1 R1   | CAGAGAGTATGTAAGCCAGAGC<br>CAGCAATAGCGGTAGCCACGGATG         | 65°C | 40 | 188 |
| <i>Nespas</i> DMR                         | MeDIP Nespas F<br>MeDIP Nespas R       | GCCTGACCCAGCCCAATAGC<br>GCCAACTACCCCTCCCAACATA             | 65°C | 40 | 149 |
| <i>Peg10</i> DMR                          | MeDIP Peg10 F2<br>MeDIP Peg10 R2       | TGAGTCCCCAAATACGC<br>GCAGTGCAATCCGTTCTGTA                  | 65°C | 40 | 74  |
| <i>Peg3</i> DMR                           | ChIP Peg3 F1<br>ChIP Peg3 R1           | ATGGGGTCTTGGATTGGTTAG<br>TCTCCGCTTCTCCTCCGATGCT            | 65°C | 40 | 136 |
| <i>Lit1</i> DMR                           | ChIP Lit1 F2<br>ChIP Lit1 R2           | TCGGTCGAGTCCCAAGGTGAGT<br>ACAGCTACCACATAACAACAGC           | 65°C | 40 | 184 |
| <i>U2af1-rs1</i> DMR                      | MeDIP U2af1-rs1 F<br>MeDIP U2af1-rs1 R | AGGGCTGAGCAITTTACTG<br>ATCCCGCAGTATGTCTGATCTG              | 65°C | 40 | 151 |
| <i>Igf2r</i> DMR2                         | ChIP-Igf2r DMR2F<br>ChIP-Igf2r DMR2R   | GAGTTTTCTTGTAGCCAGAAATCTTCA<br>TACCGAGGTGAGGGTTCCACTGAT    | 65°C | 40 | 127 |
| <i>Nanog</i>                              | Nanog-F5<br>Nanog-R5                   | TCAAGGCAACAGAGAAAAACCT<br>GGGAAACCTGGGGAAATCT              | 60°C | 40 | 147 |
| <i>Rest</i>                               | REST-F<br>REST-R                       | GCCGTGCTTTTATTTGTGC<br>ACGAAGTGAGAGACCCAGTC                | 60°C | 40 | 91  |
| <i>Aicda</i>                              | Aicda-F<br>Aicda-R                     | AGTCACGCTGGAGACCGATA<br>GGCAAGCAGACAGGAAAT                 | 60°C | 40 | 133 |
| <i>Tdrd12</i>                             | ECAT8-F<br>ECAT8-R                     | GGTGCTGAAAGGTGAGGAGTG<br>TAATCGGAACGCAAGCCTAC              | 60°C | 40 | 109 |
| <i>Gdf3</i>                               | Gdf3-F<br>Gdf3-R                       | CGAGGCACAGGTTGGAA<br>GCCAGACATCCGAGTTTCA                   | 60°C | 40 | 91  |
| <i>Slc2a3</i>                             | Slc2a3-F<br>Slc2a3-R                   | AGGACCCCAACAAGCAAAT<br>TCTGTAGGACCCGAGGAACA                | 60°C | 40 | 142 |
| <i>Utf1</i>                               | UTF1-F1<br>UTF1-R1                     | AGAATAAGCAAGGCACAGG<br>CCACACACGCTCTAAGGAC                 | 60°C | 40 | 127 |

Supplemental Table S2. DNA polymorphisms between B6 and JF1 strain and position of GenBank accession number AL669947.

| Region | Nucleotide No.<br>(AL669947) | C57BL/6                                 | JF1                        |
|--------|------------------------------|-----------------------------------------|----------------------------|
| 1      | 13907                        | G                                       | A                          |
| 2      | 14425                        | A                                       | G                          |
|        | 14688-14689                  | -                                       | TAATGTGTA                  |
|        | 14821                        | G                                       | T                          |
| 6      | 18187-18188                  | -                                       | CGG                        |
|        | 18310-18346                  | GTTTGATCCAAACGGAAGATTTTCAGGGTCCTTCCCTTG | 37 bp deletion             |
| 7      | 19155                        | G                                       | A                          |
|        | 19243                        | G                                       | C                          |
| 8      | 19943                        | G                                       | A                          |
| 9      | 20780                        | G                                       | A                          |
| 11     | 23192                        | C                                       | A                          |
|        | 23217-23218                  | GC                                      | --                         |
|        | 23239-23240                  | -                                       | TGTGTGTGTGTGTGTGTGTGTGTGTG |
| 12     | 24484                        | A                                       | G                          |
|        | 24540                        | A                                       | G                          |
| 14     | 25259                        | A                                       | G                          |
| 15     | 26681                        | C                                       | T                          |
|        | 26819                        | C                                       | T                          |
| 17     | 29060                        | G                                       | A                          |
